# Supplementary material
Source: publisher figshare collection journal article supplement (https://frontiersin.figshare.com/ndownloader/files/25546109)
Supplement: Supplementary file [file 25546109]

Supplemental Table 1. Item means for the total sample, EFA sample, and CFA sample (response codes ranged from 1-5)

| Item                                                                                           | Total Sample<br>(N = 1,050) | EFA Sample<br>(n = 350) | CFA Sample<br>(n = 700) |
|------------------------------------------------------------------------------------------------|-----------------------------|-------------------------|-------------------------|
| <b>In my family...</b>                                                                         |                             |                         |                         |
| 1. We rarely express affection to each other. (R)                                              | 3.9                         | 3.9                     | 4.0                     |
| 2. There is a feeling of togetherness.                                                         | 4.1                         | 4.1                     | 4.2                     |
| 3. We care for one another.                                                                    | 4.5                         | 4.5                     | 4.6                     |
| 4. We support each other.                                                                      | 4.4                         | 4.3                     | 4.5                     |
| 5. We rarely do things together. (R)                                                           | 3.7                         | 3.7                     | 3.8                     |
| 6. The things we do for each other make us feel a part of the family.                          | 4.2                         | 4.1                     | 4.2                     |
| 7. We have fun together.                                                                       | 4.3                         | 4.2                     | 4.3                     |
| 8. We have a hard time making decisions about how to solve everyday problems. (R) <sup>a</sup> | 3.5                         | 3.3                     | 3.6                     |
| 9. We discuss problems and feel good about the solutions.                                      | 3.8                         | 3.8                     | 3.8                     |
| 10. Sometimes it is hard to be honest and direct with each other. (R) <sup>a</sup>             | 3.1                         | 3.0                     | 3.1                     |
| 11. Family members pay attention to me.                                                        | 3.9                         | 3.9                     | 4.0                     |
| 12. Overall, I am happy with my relationship with my family members.                           | 4.1                         | 4.1                     | 4.2                     |
| 13. I feel safe in my family relationships.                                                    | 4.4                         | 4.3                     | 4.4                     |
| 14. We maintain a healthy lifestyle. <sup>b</sup>                                              | 3.9                         | 3.9                     | 3.9                     |

| Item                                                                                                                        | Total Sample<br>(N = 1,050) | EFA Sample<br>(n = 350) | CFA Sample<br>(n = 700) |
|-----------------------------------------------------------------------------------------------------------------------------|-----------------------------|-------------------------|-------------------------|
| 15. We make a point of being physically active during daily life.                                                           | 3.6                         | 3.5                     | 3.6                     |
| 16. We normally eat a healthy diet. <sup>b</sup>                                                                            | 3.5                         | 3.4                     | 3.5                     |
| 17. We usually have fresh fruits and vegetables in our home.                                                                | 4.0                         | 4.0                     | 4.0                     |
| 18. We help each other avoid unhealthy habits.                                                                              | 3.5                         | 3.5                     | 3.4                     |
| 19. We make a point to follow medical recommendations.                                                                      | 4.0                         | 4.0                     | 4.0                     |
| 20. We help each other in seeking health care services when needed (such as making doctor's appointments).                  | 4.1                         | 4.1                     | 4.1                     |
| 21. We help each other make healthy changes.                                                                                | 3.9                         | 3.9                     | 3.9                     |
| 22. One or more people in my family use cigarettes, cigars, or pipe tobacco on a daily basis. (R) <sup>a</sup>              | 3.4                         | 3.5                     | 3.3                     |
| 23. We stay hopeful even in difficult times.                                                                                | 4.1                         | 4.1                     | 4.2                     |
| 24. We have strengths to draw on when we face problems. <sup>b</sup>                                                        | 4.2                         | 4.1                     | 4.2                     |
| 25. We have beliefs that give us comfort.                                                                                   | 4.1                         | 4.1                     | 4.2                     |
| 26. We spend time in religious/spiritual activities (such as praying, meditating, or reading religious books). <sup>a</sup> | 3.3                         | 3.3                     | 3.3                     |
| 27. We can trust in the help of relatives, friends, neighbors, and/or the community. <sup>b</sup>                           | 3.8                         | 3.7                     | 3.8                     |
| 28. If we needed help from others, we would have real difficulty finding transportation to get to that help. (R)            | 3.7                         | 3.6                     | 3.7                     |
| 29. If we needed outside help, we would <u>not</u> know what sort of help was available. (R)                                | 3.6                         | 3.5                     | 3.6                     |

| Item                                                                                                                                                                                               | Total Sample<br>(N = 1,050) | EFA Sample<br>(n = 350) | CFA Sample<br>(n = 700) |
|----------------------------------------------------------------------------------------------------------------------------------------------------------------------------------------------------|-----------------------------|-------------------------|-------------------------|
| 30. Financial difficulties would be an obstacle to getting outside help. (R)                                                                                                                       | 3.2                         | 3.0                     | 3.3                     |
| 31. We do <u>not</u> trust doctors and other health professionals. (R)                                                                                                                             | 4.1                         | 4.1                     | 4.2                     |
| 32. A lack of health insurance would prevent us from asking for medical help (e.g., no health insurance or inadequate coverage). (R)                                                               | 3.4                         | 3.4                     | 3.5                     |
| 33. We have people outside of our family who we can turn to for help (such as for advice, help with childcare, a ride somewhere, or to borrow some money or something valuable)?                   | 3.7                         | 3.6                     | 3.7                     |
| 34. We have people outside of our family we can turn to when we have problems at school or work.                                                                                                   | 3.6                         | 3.6                     | 3.6                     |
| 35. If we needed financial help, we have people outside of our family we could turn to for a loan (e.g., for \$200)                                                                                | 3.4                         | 3.3                     | 3.4                     |
| 36. If we needed help, we have people outside of our family who could provide our family with a place to live.                                                                                     | 3.4                         | 3.4                     | 3.4                     |
| <b>In the past 30 days...</b>                                                                                                                                                                      |                             |                         |                         |
| 37. My PHYSICAL health or the PHYSICAL health of my family members got in the way of MY FAMILY's normal daily activities (such as household chores, work, school, or recreation). (R) <sup>b</sup> | 3.5                         | 3.5                     | 3.6                     |

| Item                                                                                                                                                                              | Total Sample<br>(N = 1,050) | EFA Sample<br>(n = 350) | CFA Sample<br>(n = 700) |
|-----------------------------------------------------------------------------------------------------------------------------------------------------------------------------------|-----------------------------|-------------------------|-------------------------|
| 38. My MENTAL health or the MENTAL health of my family members got in the way of MY FAMILY's normal daily activities (such as household chores, work, school, or recreation). (R) | 3.6                         | 3.5                     | 3.6                     |
| 39. My family members and I had frequent minor disagreements (e.g., "spats," getting on each other's nerves). (R) <sup>a</sup>                                                    | 3.1                         | 3.1                     | 3.1                     |
| 40. My family members and I had frequent major disagreements (e.g., big fights, "blow-ups"). (R) <sup>a</sup>                                                                     | 3.8                         | 3.8                     | 3.8                     |
| 41. My family could always afford to eat nutritious meals. <sup>a</sup>                                                                                                           | 3.8                         | 3.7                     | 3.9                     |
| 42. Family worries and problems distracted me when I was working. (R)                                                                                                             | 3.4                         | 3.3                     | 3.4                     |
| <b>In the past 12 months...</b>                                                                                                                                                   |                             |                         |                         |
| 43. My family did <u>not</u> have enough money at the end of the month after bills were paid. (R)                                                                                 | 3.6                         | 3.5                     | 3.7                     |
| 44. My family had difficulty paying our bills. (R) <sup>b</sup>                                                                                                                   | 3.6                         | 3.5                     | 3.6                     |
| 45. My family had to eat a limited variety of foods because of a lack of resources. (R) <sup>b</sup>                                                                              | 3.8                         | 3.7                     | 3.8                     |
| 46. My family had to eat fewer meals in a day because there was <u>not</u> enough food. (R) <sup>b</sup>                                                                          | 4.1                         | 4.0                     | 4.1                     |
| 47. My family did <u>not</u> have adequate housing. (R)                                                                                                                           | 4.3                         | 4.3                     | 4.3                     |
